# Supplementary material for: ZFAS1: a long noncoding RNA associated with ribosomes in breast cancer cells
Source: PubMed Central journal article supplement (PMC5117590; doi:10.1186/s13062-016-0165-y), 2016-11-21

A

| Primer set        | cDNA dilution | Log dilution | Average CT |
|-------------------|---------------|--------------|------------|
| ZFAS1-1           | 1/20          | -1.30        | 20.43      |
|                   | 1/40          | -1.60        | 20.88      |
|                   | 1/80          | -1.90        | 22.00      |
|                   | 1/160         | -2.20        | 23.15      |
| <b>Slope</b>      |               | <b>-3.07</b> |            |
| <b>Efficiency</b> |               | <b>1.98</b>  |            |

| Primer set        | cDNA dilution | Log dilution | Average CT |
|-------------------|---------------|--------------|------------|
| ZNFX1-1           | 1/20          | -1.30        | 22.45      |
|                   | 1/40          | -1.60        | 23.42      |
|                   | 1/80          | -1.90        | 24.30      |
|                   | 1/160         | -2.20        | 25.45      |
| <b>Slope</b>      |               | <b>-3.28</b> |            |
| <b>Efficiency</b> |               | <b>1.97</b>  |            |

| Primer set        | cDNA dilution | Log dilution | Average CT |
|-------------------|---------------|--------------|------------|
| ZFAS1-2           | 1/20          | -1.30        | 22.44      |
|                   | 1/40          | -1.60        | 22.98      |
|                   | 1/80          | -1.90        | 23.94      |
|                   | 1/160         | -2.20        | 24.93      |
| <b>Slope</b>      |               | <b>-2.79</b> |            |
| <b>Efficiency</b> |               | <b>2.28</b>  |            |

| Primer set        | cDNA dilution | Log dilution        | Average CT |
|-------------------|---------------|---------------------|------------|
| ZNFX1-2           | 1/20          | -1.30               | 24.45      |
|                   | 1/40          | -1.60               | 24.66      |
|                   | 1/80          | -1.90               | 25.45      |
|                   | 1/160         | -2.20               | 26.55      |
| <b>Slope</b>      |               | <b>-2.353487228</b> |            |
| <b>Efficiency</b> |               | <b>2.660121004</b>  |            |

B

**ZFAS1 -1**  $y = -3.0747x + 16.225$   
 $R^2 = 0.9682$

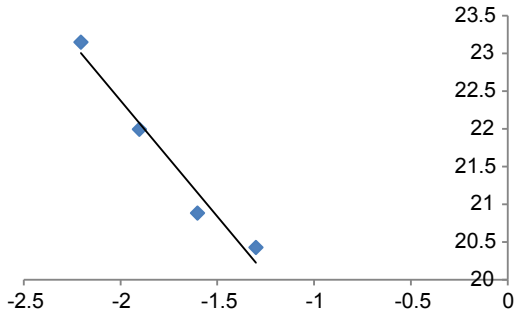

**ZFAS1 -2**  $y = -2.7911x + 18.681$   
 $R^2 = 0.9838$

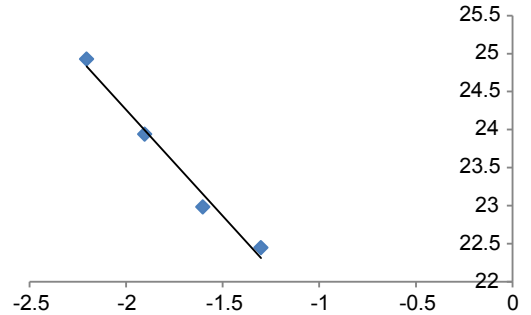

**ZNFX1 -1**  $y = -3.2808x + 18.151$   
 $R^2 = 0.997$

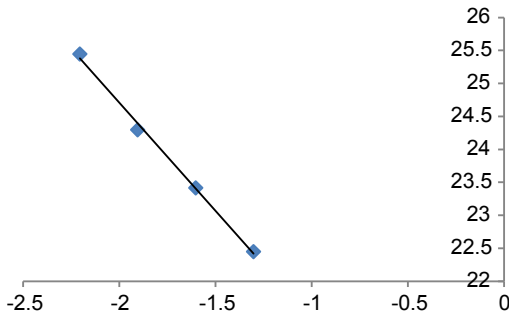

**ZNFX1 -2**  $y = -2.3535x + 21.152$   
 $R^2 = 0.9245$

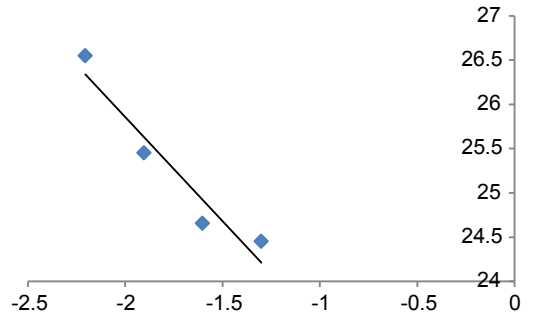

C

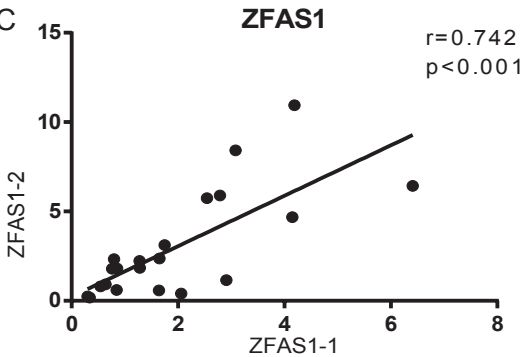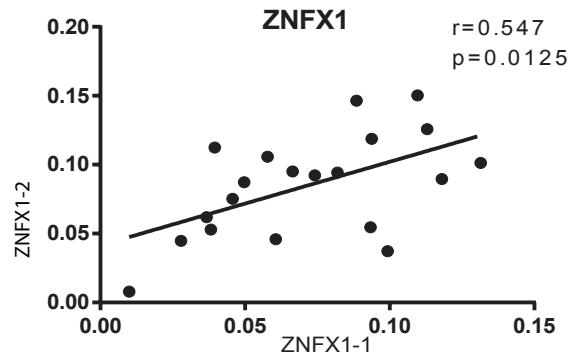

Supplement: 13062_2016_165_MOESM13_ESM.pdf [file 13062_2016_165_MOESM13_ESM.pdf]
