# Supplementary material for: ZFAS1: a long noncoding RNA associated with ribosomes in breast cancer cells
Source: PubMed Central journal article supplement (PMC5117590; doi:10.1186/s13062-016-0165-y), 2016-11-21

**A**

1        10        20        30        40        50        60        70        80  
 |-----|-----|-----|-----|-----|-----|-----|-----|-----|-----|

seq1    TTTTCGCGTCTGCGGGTCTCGGAGTGTGGTACTTCTCCTAGTTGCAGTCAGGCTTCATACGCTGTGTCTCTGCCCGT  
 seq2    CTTTCGCGTCTGCGGGTCTCGGAGTGTGGTACTTCTCCTAGTTGCAGTCAGGCTTCATACGCTGTGTCTCTGCCCGT  
 seq3    TTTTCGCGTCTGCGGGTCTCGGAGTGTGGTACTTCTCCTAGTTGCAGTCAGGCTTCATACGCTGTGTCTCTGCCCGT  
 seq4    TTTTCTTTTCGCGTNTGCGGGTCCCGGAGTGTGGTACTTCTCCTAGTTGCAGTCAGGCTTCATACGCTACTGTCTCTGCCCGT  
*ZFAS1* CTTTCGCGTCTGCGGGTCTCGGAGTGTGGTACTTCTCCTAGTTGCAGTCAGGCTTCATACGCTATTGTCTCTGCCCGT  
 Consensus cTTTCGCGTcTGC GG TGcTCGGAGTGTGGTACTTCTCCTAGTTGCAGTCAGGCTTCATACGCTgtGTCTCTGCCCGT

**B**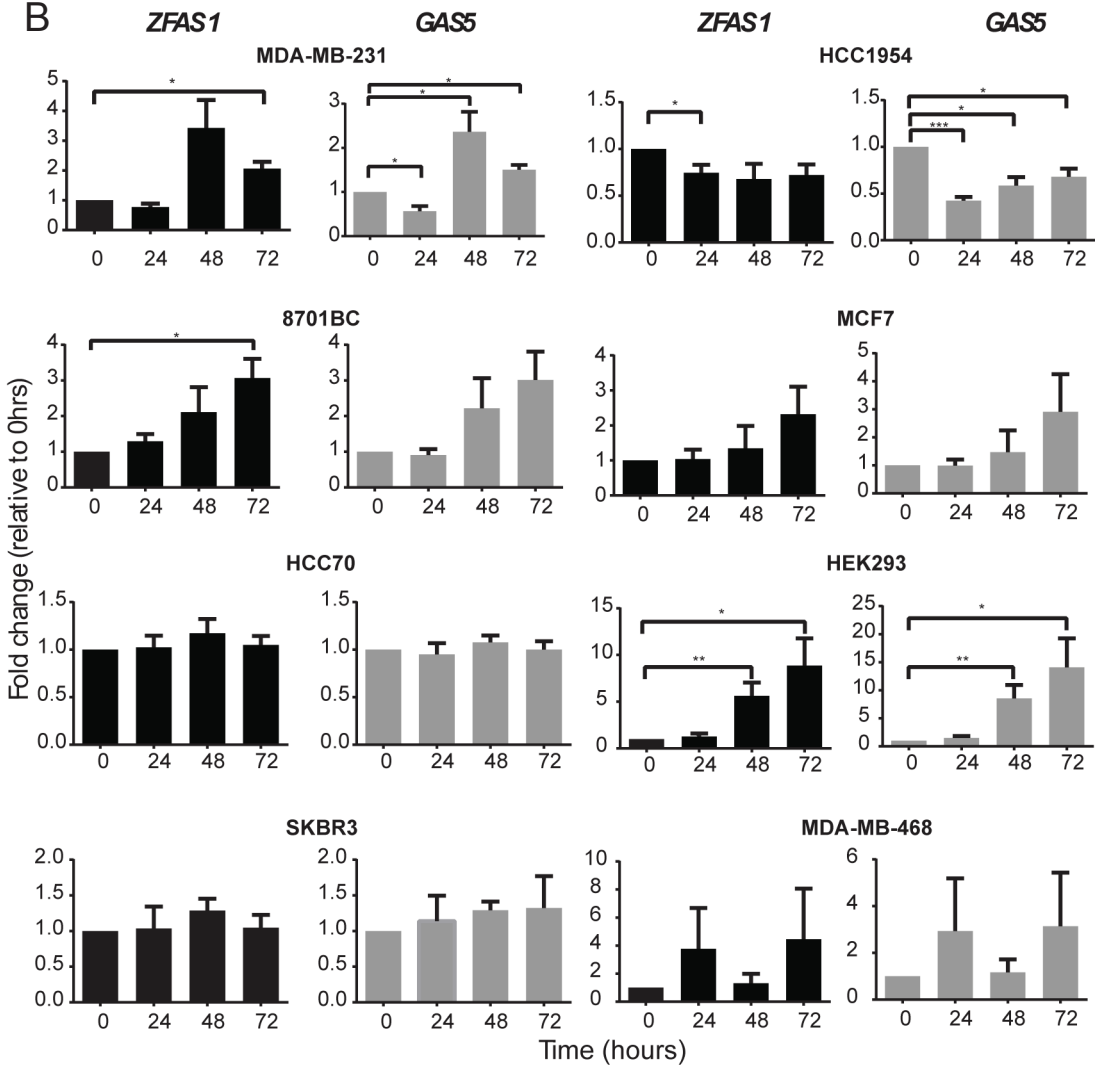

Supplement: 13062_2016_165_MOESM6_ESM.pdf [file 13062_2016_165_MOESM6_ESM.pdf]
