# Supplementary material for: ZFAS1: a long noncoding RNA associated with ribosomes in breast cancer cells
Source: PubMed Central journal article supplement (PMC5117590; doi:10.1186/s13062-016-0165-y), 2016-11-21
Supplement: 13062_2016_165_MOESM8_ESM.pdf [file 13062_2016_165_MOESM8_ESM.pdf]

**ZFAS1****GAS5**

MDA-MB-468

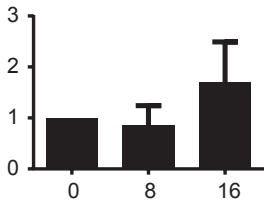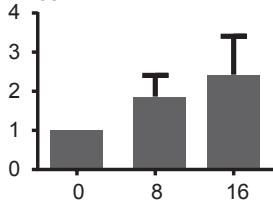

HeLa

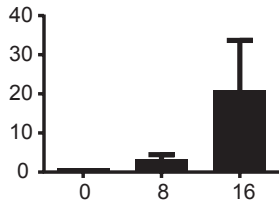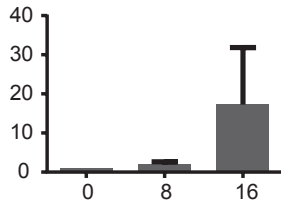

Time (hours)
