# Supplementary material for: ZFAS1: a long noncoding RNA associated with ribosomes in breast cancer cells
Source: PubMed Central journal article supplement (PMC5117590; doi:10.1186/s13062-016-0165-y), 2016-11-21

## ZFAS1

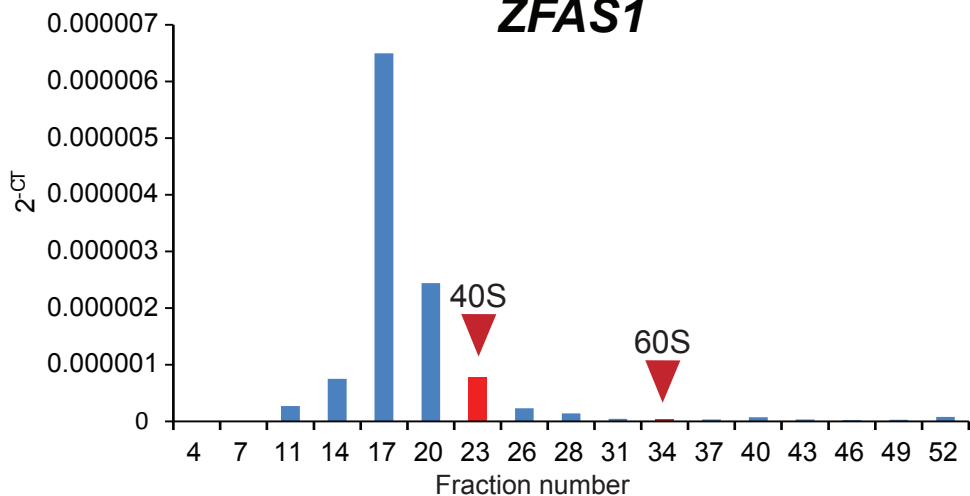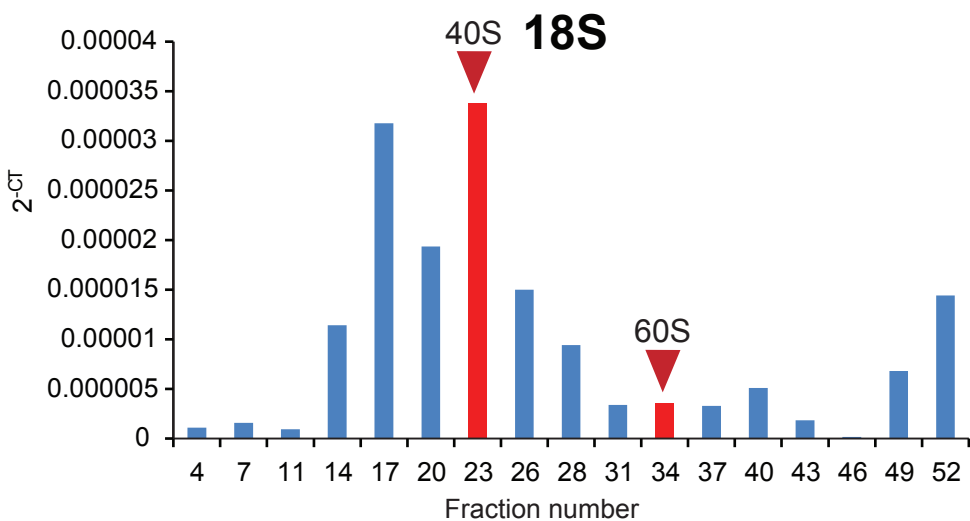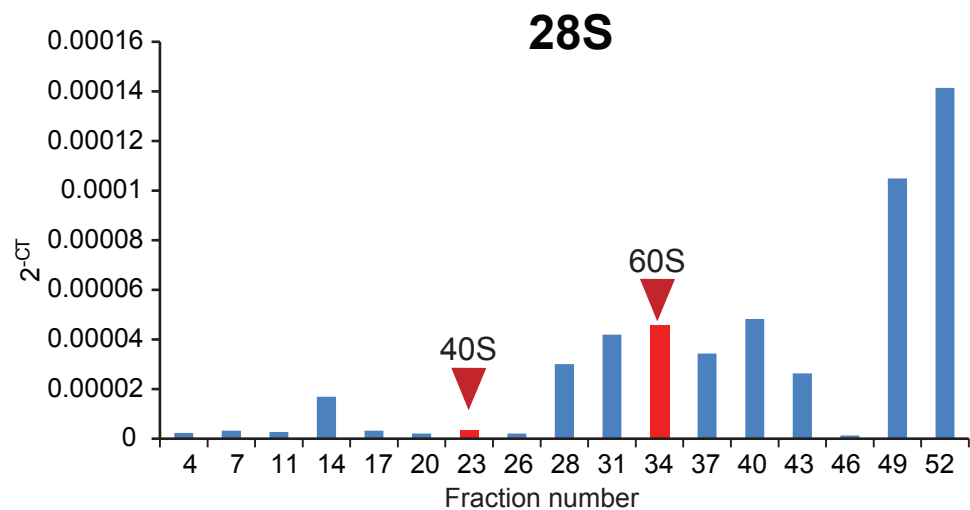

Supplement: 13062_2016_165_MOESM14_ESM.pdf [file 13062_2016_165_MOESM14_ESM.pdf]
